# Supplementary material
Source: publisher site journal article supplement (https://www.dovepress.com/article/274420)
Supplement: Supplementary file 1 [file get_supplementary_file.php]

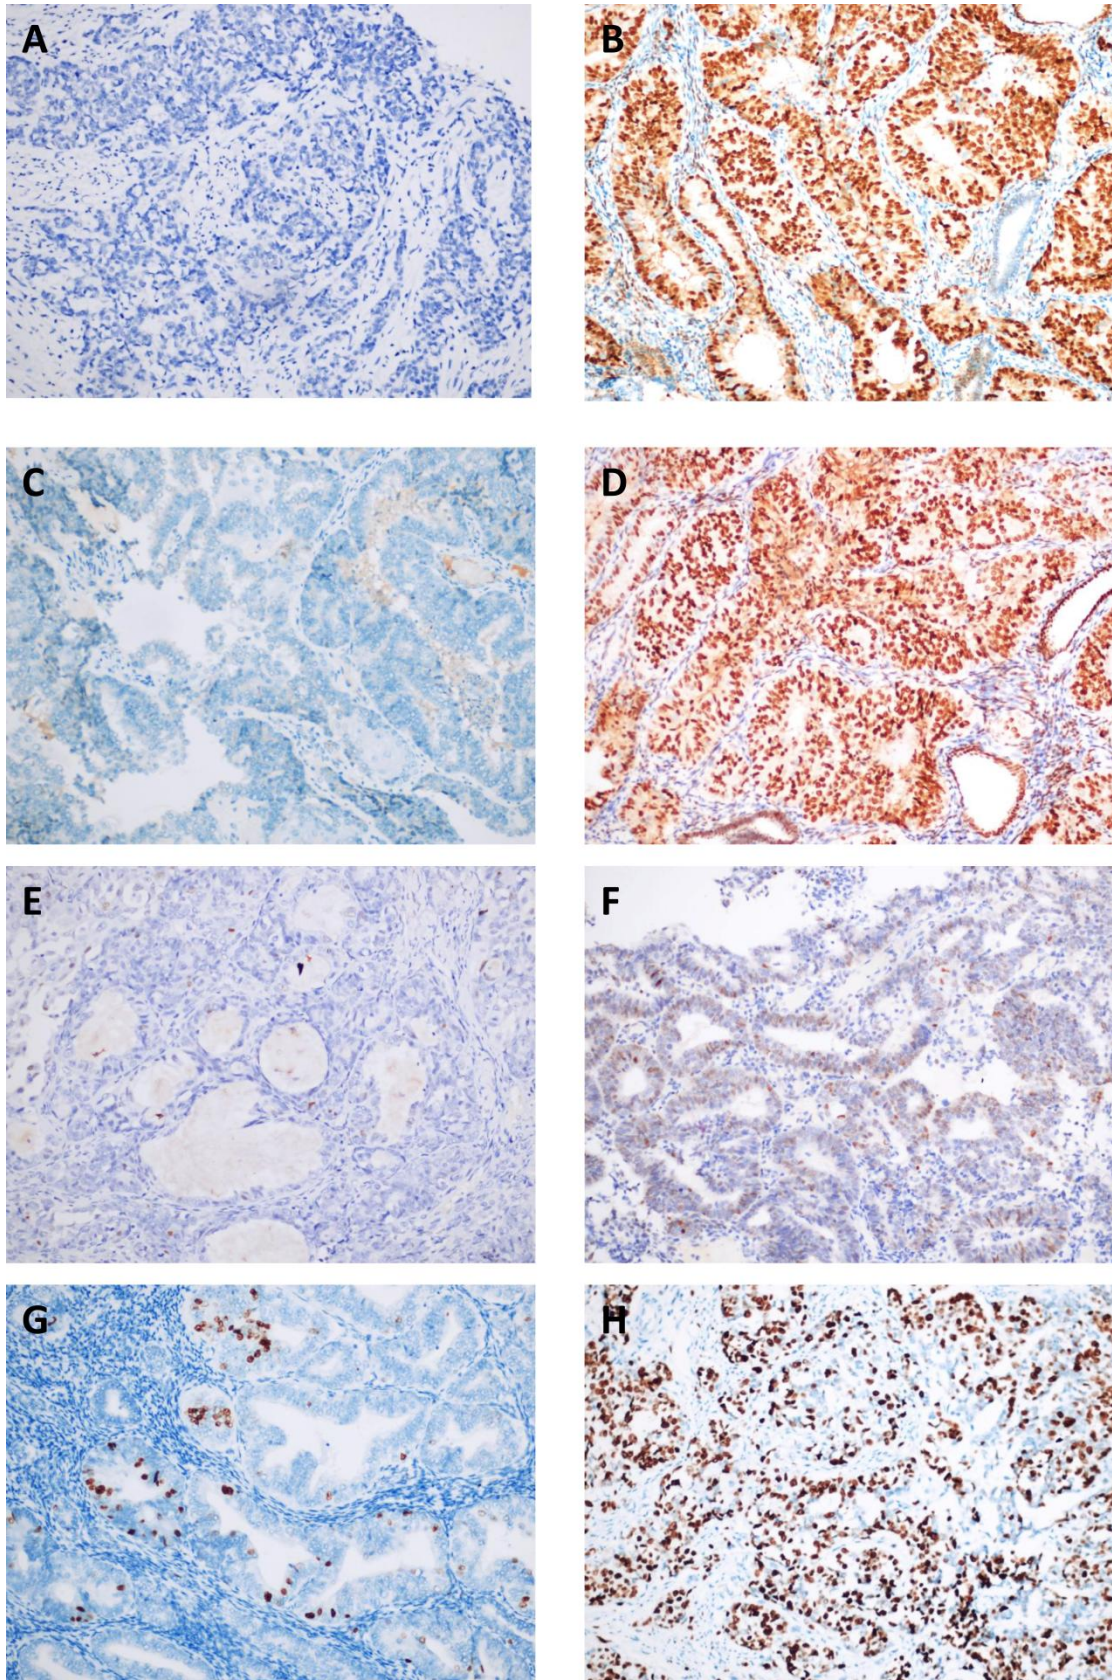

**Supplementary Fig.1** : Immunohistochemistry (IHC) of ER, PR, Ki67 and P53.

Notes: (A) Negative expression of ER; (B) Positive expression of ER; (C) Negative expression of PR; (D) Positive expression of PR; (E) Negative expression of P53; (F) Positive expression of P53; (G) Low expression of Ki67; (H) High expression of Ki67. Scale bar: 200  $\mu\text{m}$ .

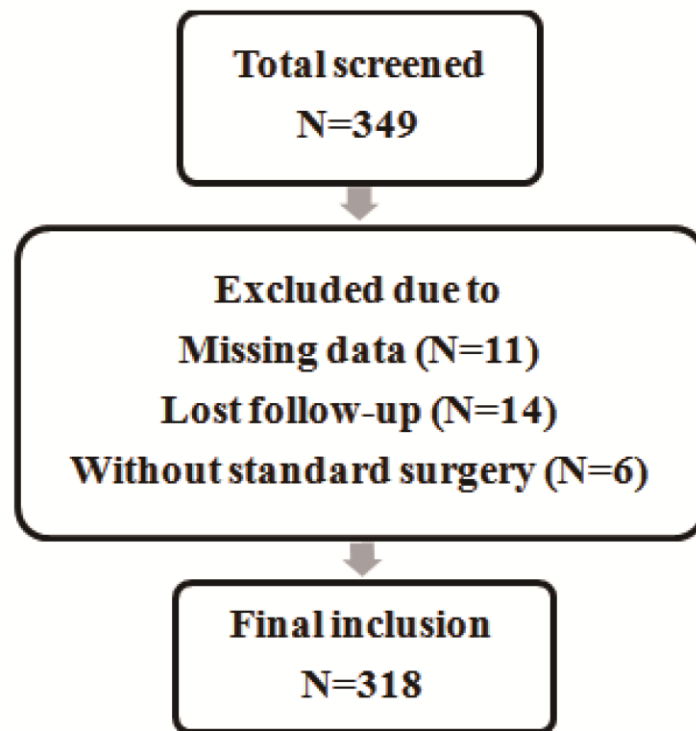

**Supplementary Fig.2:** Flow chart for patient inclusion

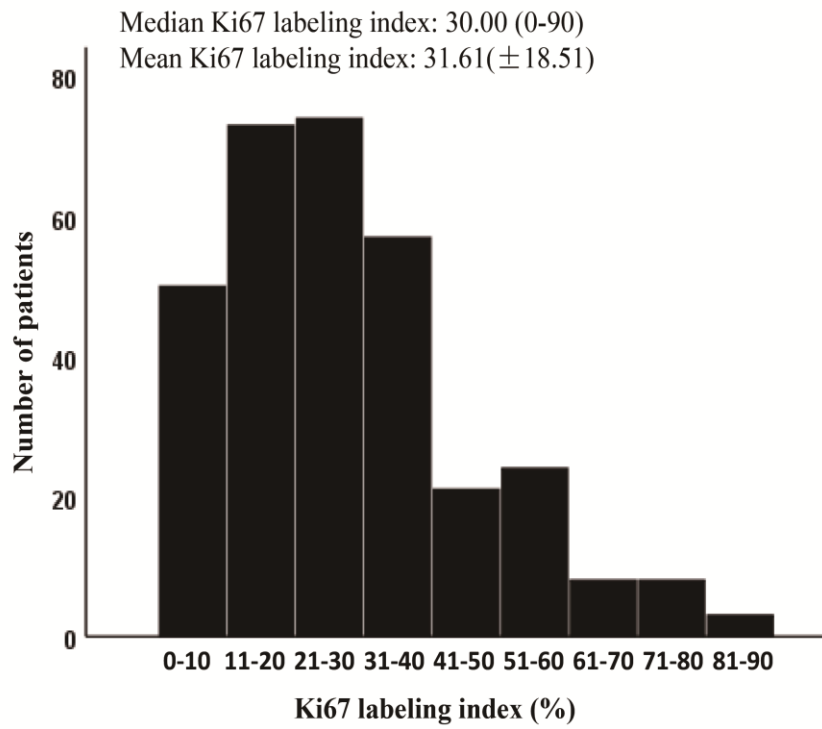

**Supplementary Fig.3:** Distribution of patients according to the Ki67 labeling index

Notes: Ki67 labeling index ranged from 0 to 90% (median 30%)

**Supplementary Tab. 1 Basline characteristics of relapsed patients (n=46).**

| <b>Characteristics</b>                   | <b>All patients(n=46)</b> | <b>%</b> |
|------------------------------------------|---------------------------|----------|
| <b>Sites of relapsed</b>                 |                           |          |
| Vaginal stump                            | 2                         | 4.3      |
| Central pelvic region                    | 13                        | 28.3     |
| Lymph nodes (upper para-aortic)          | 5                         | 10.9     |
| Peritoneal metastases                    | 9                         | 19.6     |
| Metastasis to other organs               | 17                        | 37.0     |
| <b>Recurrence-free survival (months)</b> |                           |          |
| Median                                   | 22.50                     |          |
| Mean ( $\pm$ SD)                         | 23.37( $\pm$ 10.96)       |          |
| Range                                    | 6-48                      |          |
| <b>Follow-up (months)</b>                |                           |          |
| Median                                   | 36                        |          |
| Mean ( $\pm$ SD)                         | 36.74( $\pm$ 13.33)       |          |
| Range                                    | 12-60                     |          |

**Supplementary Tab. 2 Comparison of recurrence-free survival of patients with early low-risk endometrial cancer who didn't receive adjuvant treatment after surgery between low-Ki67 and high-Ki67 group(n=118)**

| Groups          | All patients<br>(n=118) | Recurrence patients<br>(n=8) | 3-year recurrence-free survival<br>(95%CI) | P-value |
|-----------------|-------------------------|------------------------------|--------------------------------------------|---------|
| Low-Ki67 group  | 91<br>(77.1%)           | 1                            | 98.7%<br>(96.2%-100%)                      | 0.000   |
| High-Ki67 group | 27<br>(22.9%)           | 7                            | 72.6%<br>(55.2%-90.0%)                     |         |
